# Supplementary material
Source: ML conference proceedings conference paper supplement (https://openreview.net/forum?id=0klioDjSVM)
Supplement: supplementary_material [file SUPP.pdf › 12583_Delta_Triplane_Transform_Supplementary Material/SUPP.pdf]

# SUPPLEMENTARY MATERIAL FOR “DELTA-TRIPLANE TRANSFORMERS AS OCCUPANCY WORLD MODELS”

**Anonymous authors**

Paper under double-blind review

The contents of this supplementary material are organized as follows:

- Section S1 presents additional visualization examples.
- Section S2 provides additional implementation details.
- Section S3 provides additional ablation study.
- Section S4 analyzes the limitations of our approach.
- Section S5 discusses potential directions for future work.

## S1 ADDITIONAL EXPERIMENTAL RESULTS

More visual comparison results and their corresponding analysis are presented in Figures S1 and S2.

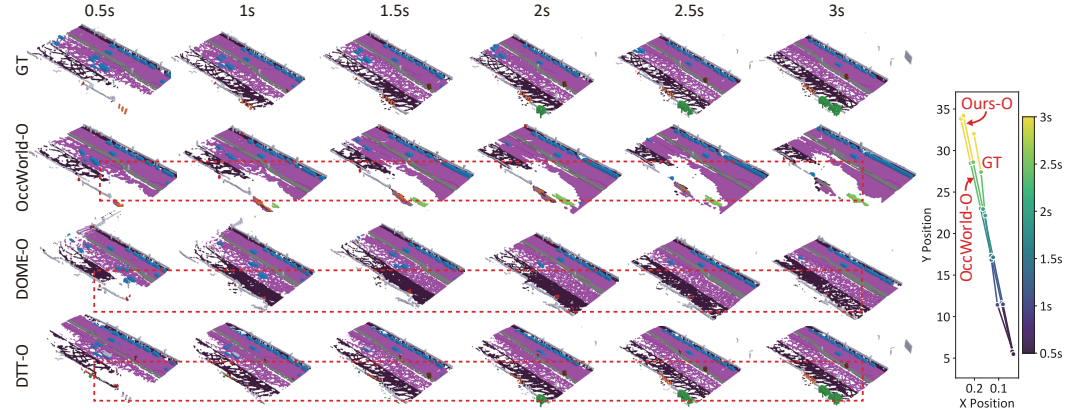

Figure S1: In this scenario, it is clear that the GT contains radially sparse occupied voxels on the ground. Due to the use of VQ-VAE (Van Den Oord et al., 2017) in OccWorld-O, the sparse occupancy data is prone to loss during the reconstruction process. As a result, OccWorld-O’s predictions exhibit large blank areas on the ground, with trees and road boundaries missing in these regions. These details are crucial for future motion planning. **DOME-O alleviates the boundary-missing issue through its diffusion-based refinement.** However, it slightly overestimates the dynamics of the left-lane vehicles, causing them to exit the frame earlier than in the ground truth, where they actually fade out gradually. In contrast, our method preserves a consistent road layout throughout a 3-second prediction period, and the predicted number of vehicles is more aligned with the GT over time.

## S2 ADDITIONAL IMPLEMENTATION DETAILS

### S2.1 NETWORK ARCHITECTURE

Figures S3 and S4 illustrate the detailed structure of the encoder and decoder used to obtain triplane representations, respectively.

Figure S5 shows the detailed structure of the scene forecasting model  $\Phi_{\text{fut}}$ . For each feature plane, we perform prediction independently. Taking the  $xy$  plane as an example, the input consists of four historical frames that are concatenated along the temporal dimension, resulting in a tensor of size

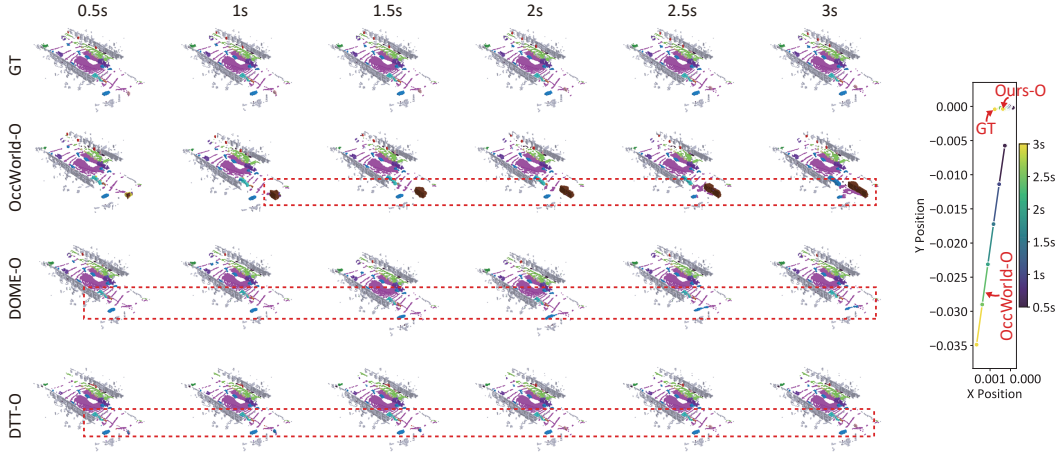

Figure S2: In this scenario, the occupancy data exhibits a sparser radial distribution of LiDAR point clouds, resulting in fewer semantic voxels for distant objects. As a consequence, OccWorld-O incorrectly classifies the small bicycle as a trailer, leading to subsequent predictions of a trailer. While DOME-O does not introduce incorrect objects near the boundaries, the car at the edge appears incomplete in shape. In contrast, our method consistently identifies the bicycle correctly. Due to OccWorld-O’s semantic prediction error, it erroneously anticipates a trailer ahead, causing a significant deviation between its predicted trajectory and the GT, while our method remains aligned with GT.

(4, 8, 100, 100). This input is then processed with a standard U-Net architecture (Ronneberger et al., 2015), which is widely used and open-sourced. The U-Net includes a downsampling path and an upsampling path, where the DoubleConv and Down modules are applied, each parameterized by the number of input and output channels. The exact network parameters are provided in our code, while the output dimensions are indicated in gray in Figure S5.

Next, the downsampled features are converted into tokens, where each spatial location is treated as one token. Since the feature maps of the first two scales are too large, we apply Adaptive Pooling to reduce them to  $25 \times 25$ , preventing overly sparse attention and excessive memory usage in the Transformer. The tokenized features are first passed through a Transformer encoder to capture temporal dependencies across tokens, and then through a Transformer decoder, which predicts the future tokens at each scale. These predicted tokens are then detokenized, i.e., reshaped back into 2D feature planes.

Finally, the reconstructed features are progressively upsampled using the Up modules of the U-Net to produce  $\Delta$ . This  $\Delta$  is added to the last  $xy$ -plane feature after a  $1 \times 1$  convolution, yielding the predicted  $xy$  plane for the next timestep. The same process is applied to each plane, differing only in input dimensions, as illustrated in Figure 3 of the main text.

## S2.2 HYPERPARAMETER SETTINGS

A full list of hyperparameters is provided in Table S1.

## S2.3 OPTIMIZATION

To accelerate training and mitigate the accumulation of errors in the model, we adopt the Teacher Forcing technique (Sutskever et al., 2014) for training DTT. Specifically, since the triplane representations for all scenes are pre-trained, the ground truth triplanes for future time steps are already known. As a result, with a certain probability  $p$  (we use  $p = 0.2$  in this paper), we randomly feed the future GT into the model instead of the predicted values during autoregressive prediction. Concretely, the terms  $\hat{s}_t^{k-1}$  in Eqs. (5)(8) are replaced with  $s_t^{k-1}$ . This technique accelerates the convergence of training and reduces the error accumulation in the model’s autoregressive predictions.

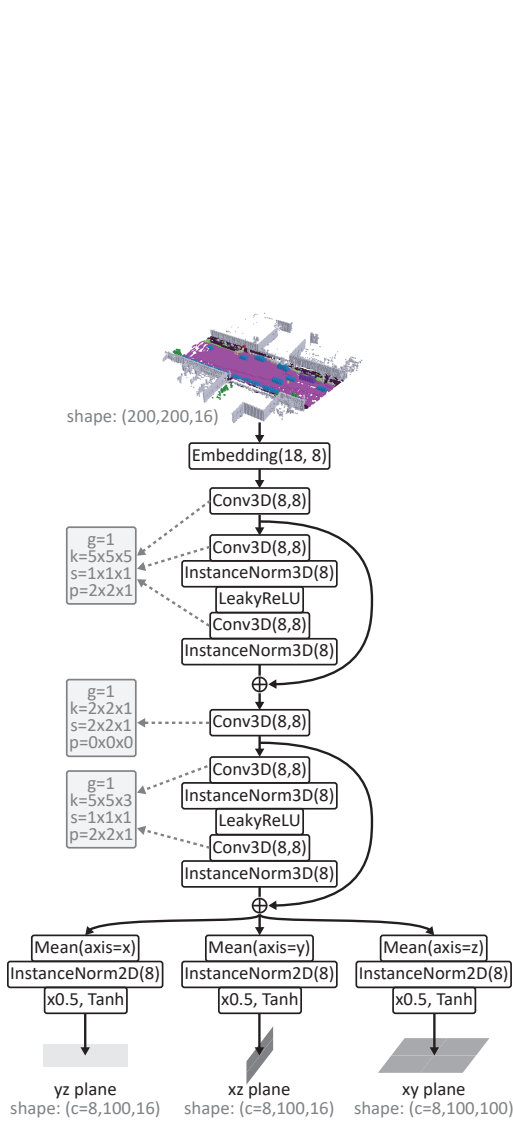Figure S3: Detailed network structure of  $\Phi_{enc}$ .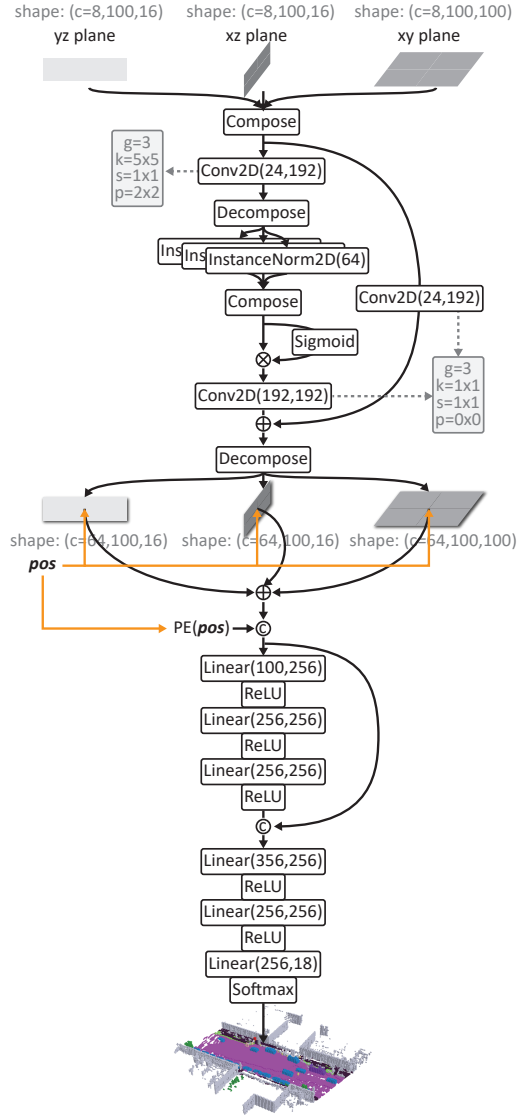Figure S4: Detailed network structure of  $\Phi_{dec}$ .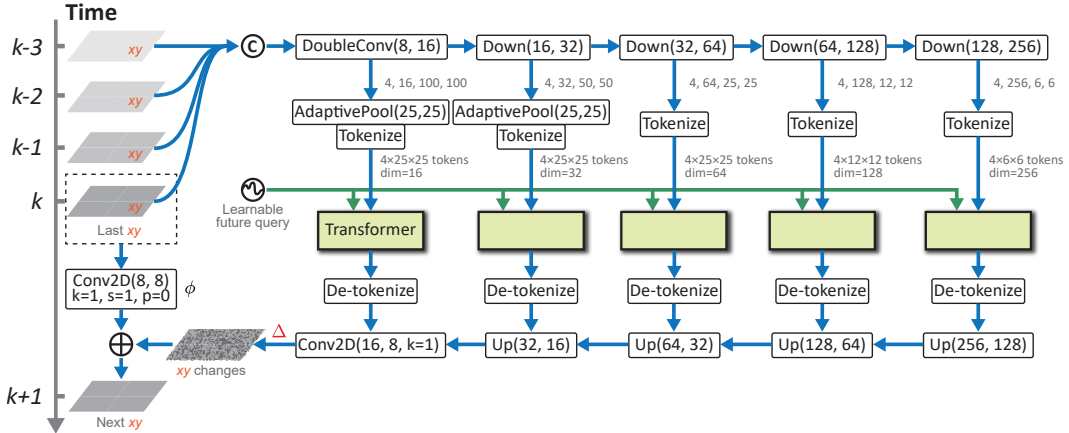Figure S5: Detailed network structure of  $\Phi_{fut}$ .

| Hyperparameter                             | Value           | Description                                                    |
|--------------------------------------------|-----------------|----------------------------------------------------------------|
| $H, W, L$                                  | 200, 200, 16    | Dimensions of the occupancy data                               |
| $\tau_p$                                   | 4               | Number of input past frames                                    |
| $\tau_f$                                   | 6               | Number of predicted future frames                              |
| $c, h, w, l$                               | 8, 16, 100, 100 | Dimensions of the triplane representation                      |
| $V$                                        | 5               | Number of scales in DTT                                        |
| $c_{xy}^{v=1}, w_{xy}^{v=1}, h_{xy}^{v=1}$ | 16, 100, 100    | Feature dimensions for the first scale in the $xy$ plane       |
| $c_{xy}^{v=2}, w_{xy}^{v=2}, h_{xy}^{v=2}$ | 32, 50, 50      | Feature dimensions for the second scale in the $xy$ plane      |
| $c_{xy}^{v=3}, w_{xy}^{v=3}, h_{xy}^{v=3}$ | 64, 25, 25      | Feature dimensions for the third scale in the $xy$ plane       |
| $c_{xy}^{v=4}, w_{xy}^{v=4}, h_{xy}^{v=4}$ | 128, 12, 12     | Feature dimensions for the fourth scale in the $xy$ plane      |
| $c_{xy}^{v=5}, w_{xy}^{v=5}, h_{xy}^{v=5}$ | 256, 6, 6       | Feature dimensions for the fifth scale in the $xy$ plane       |
| $c_{xz}^{v=1}, w_{xz}^{v=1}, h_{xz}^{v=1}$ | 16, 100, 16     | Feature dimensions for the first scale in the $xz$ plane       |
| $c_{xz}^{v=2}, w_{xz}^{v=2}, h_{xz}^{v=2}$ | 32, 50, 8       | Feature dimensions for the second scale in the $xz$ plane      |
| $c_{xz}^{v=3}, w_{xz}^{v=3}, h_{xz}^{v=3}$ | 64, 25, 4       | Feature dimensions for the third scale in the $xz$ plane       |
| $c_{xz}^{v=4}, w_{xz}^{v=4}, h_{xz}^{v=4}$ | 128, 12, 2      | Feature dimensions for the fourth scale in the $xz$ plane      |
| $c_{xz}^{v=5}, w_{xz}^{v=5}, h_{xz}^{v=5}$ | 256, 6, 1       | Feature dimensions for the fifth scale in the $xz$ plane       |
| $c_{yz}^{v=1}, w_{yz}^{v=1}, h_{yz}^{v=1}$ | 16, 100, 16     | Feature dimensions for the first scale in the $yz$ plane       |
| $c_{yz}^{v=2}, w_{yz}^{v=2}, h_{yz}^{v=2}$ | 32, 50, 8       | Feature dimensions for the second scale in the $yz$ plane      |
| $c_{yz}^{v=3}, w_{yz}^{v=3}, h_{yz}^{v=3}$ | 64, 25, 4       | Feature dimensions for the third scale in the $yz$ plane       |
| $c_{yz}^{v=4}, w_{yz}^{v=4}, h_{yz}^{v=4}$ | 128, 12, 2      | Feature dimensions for the fourth scale in the $yz$ plane      |
| $c_{yz}^{v=5}, w_{yz}^{v=5}, h_{yz}^{v=5}$ | 256, 6, 1       | Feature dimensions for the fifth scale in the $yz$ plane       |
| $d_{act}$                                  | 50              | Dimension of the action token                                  |
| $\lambda$                                  | 0.1             | Trade-off factor for $\mathcal{L}_{lz}$ in $\mathcal{L}_{occ}$ |
| $\xi$                                      | 0.1             | Trade-off factor for $\mathcal{L}_{occ}$ in $J_{fut}$          |
| AdamW( $\beta_1, \beta_2$ )                | 0.9, 0.999      | Optimizer used for training DTT                                |
| -                                          | 0.001           | Initial learning rate                                          |
| -                                          | 0.01            | Weight regularization factor                                   |
| -                                          | 10              | Batch size for training $J_{enc, dec}$                         |
| -                                          | 1               | Batch size for training $J_{fut}$ and $J_{act}$                |

Table S1: Complete list of hyperparameters used in DTT.

### S3 ADDITIONAL ABLATION STUDY

In Eq. 5, instead of directly adding the latent change element-wise to the most recent historical state, we use a lightweight  $1 \times 1$  convolutional network mapping  $\phi$ . This operation provides a more flexible aggregation method, introduces only a small computational overhead, and offers a slight performance improvement, as shown in Table S2.

Table S2: Effect of  $\phi$ .

| Idx.      | Models     | Avg. mIoU $\uparrow$ | Avg. L2 $\downarrow$ | FPS $\uparrow$ |
|-----------|------------|----------------------|----------------------|----------------|
| <b>A0</b> | DTT-O      | <b>30.85</b>         | <b>1.00</b>          | 26             |
| <b>A1</b> | w/o $\phi$ | 30.45                | 1.01                 | 26             |

### S4 LIMITATION ANALYSIS

Our triplane-based encoder ensures high-fidelity occupancy compression and reconstruction under general conditions. However, when dealing with low-quality or noisy occupancy predictions from camera-based 3D occupancy networks, its robustness is limited, which exposes certain weaknesses of DTT-F. In contrast, the DOME method employs a VAE-style encoder combined with a diffusion architecture, providing greater robustness to low-quality occupancy inputs.

Besides, we observe that when the quality of the occupancy input improves – for example, when using TPVFormer (Huang et al., 2023) instead of FB-Occ – the performance gain of our method is noticeably larger than that of DOME, as shown in the table below. This suggests that our approach will continue to improve as the underlying occupancy predictions become more accurate.

Figure S6 presents a more detailed illustration of the first failure case from Figure 8 in the main paper across three consecutive frames. In this scenario, the distant road boundary contains only very

Table S3: Effect of different occupancy networks.

| mIoU (%) $\uparrow$ | 0s    | 1s    | 2s    | 3s    | Avg.  |
|---------------------|-------|-------|-------|-------|-------|
| FB-Occ+Ours         | 43.52 | 24.87 | 18.30 | 15.63 | 19.60 |
| TPVFormer+Ours      | 64.13 | 29.61 | 20.78 | 18.41 | 22.60 |
| FB-Occ+DOME         | 75.00 | 24.12 | 17.41 | 13.24 | 18.25 |
| TPVFormer+DOME      | 76.14 | 26.58 | 18.54 | 13.98 | 19.70 |

sparse occupied voxels, making accurate prediction particularly challenging. Due to the inherent blurring tendency of VAE-based decoders (Choi & Min, 2022; Higgins et al., 2017), OccWorld-O tends to oversmooth these sparse regions. DOME-O alleviates this issue through its diffusion-based refinement process, which better preserves structural details.

In contrast, our triplane representation retains fine-grained geometric structures. As a result, our model also predicts sparse boundaries that reflect these details, but this occasionally leads to slight deviations in the resulting trajectory. This observation suggests that diffusion-based architectures may provide stronger robustness in handling extremely sparse boundary regions, and integrating such mechanisms into triplane-based prediction could be a promising direction for future improvement.

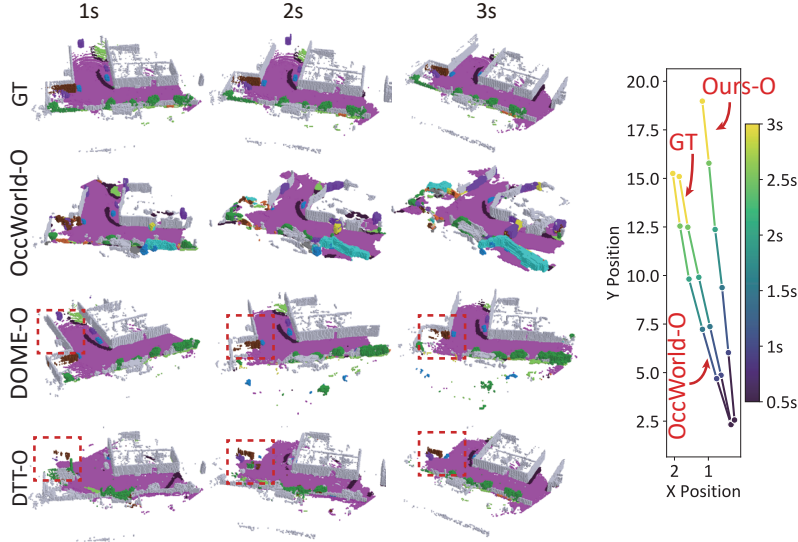

Figure S6: A failure case at a T-junction scenario.

## S5 FUTURE DIRECTION

In future work, we will focus on two main aspects:

- **Controllable action injection.** In DTT, actions are currently injected implicitly through history, which limits the ability to condition scene generation on sudden future interventions (e.g., forcing the vehicle to turn left or right at  $t = 1.5$  s). Allowing such arbitrary conditioning would enable more flexible and diverse scene generation, supporting goal-directed forecasting.
- **Explicit modeling of dynamic object regions.** In autonomous driving scenarios, new objects may enter while old objects exit. Explicitly predicting these areas can enhance the accuracy of prediction tasks and provide early warnings to drivers. As a result, we will integrate the triplane with explicit predictions of these areas in our future work.
- **Closed-loop evaluation.** Neither NavSim (Dauner et al., 2024) nor nuPlan (Caesar et al., 2021) provides 3D occupancy annotations, and generating reliable occupancy ground truth remains challenging due to the need for accurate geometry, occlusion reasoning, and multi-view consistency.

Existing pipelines such as (Tian et al., 2023) typically rely on a semi-automatic process followed by manual inspection to correct occlusion-induced holes. We believe that evaluating occupancy world models in closed-loop settings on NavSim or nuPlan represents a valuable and impactful direction for future work.

## REFERENCES

- Holger Caesar, Juraj Kabzan, Kok Seang Tan, Whye Kit Fong, Eric Wolff, Alex Lang, Luke Fletcher, Oscar Beijbom, and Sammy Omari. nuplan: A closed-loop ml-based planning benchmark for autonomous vehicles. *arXiv preprint arXiv:2106.11810*, 2021.
- Dooseop Choi and KyoungWook Min. Hierarchical latent structure for multi-modal vehicle trajectory forecasting. In *European conference on computer vision*, pp. 129–145. Springer, 2022.
- Daniel Dauner, Marcel Hallgarten, Tianyu Li, Xinshuo Weng, Zhiyu Huang, Zetong Yang, Hongyang Li, Igor Gilitschenski, Boris Ivanovic, Marco Pavone, et al. Navsim: Data-driven non-reactive autonomous vehicle simulation and benchmarking. *Advances in Neural Information Processing Systems*, 37:28706–28719, 2024.
- Irina Higgins, Loic Matthey, Arka Pal, Christopher Burgess, Xavier Glorot, Matthew Botvinick, Shakir Mohamed, and Alexander Lerchner. beta-vae: Learning basic visual concepts with a constrained variational framework. In *International conference on learning representations*, 2017.
- Yuanhui Huang, Wenzhao Zheng, Yunpeng Zhang, Jie Zhou, and Jiwen Lu. Tri-perspective view for vision-based 3d semantic occupancy prediction. In *Proceedings of the IEEE/CVF conference on computer vision and pattern recognition*, pp. 9223–9232, 2023.
- Olaf Ronneberger, Philipp Fischer, and Thomas Brox. U-net: Convolutional networks for biomedical image segmentation. In *Medical image computing and computer-assisted intervention—MICCAI 2015: 18th international conference, Munich, Germany, October 5–9, 2015, proceedings, part III 18*, pp. 234–241. Springer, 2015.
- Ilya Sutskever, Oriol Vinyals, and Quoc V Le. Sequence to sequence learning with neural networks. *Advances in neural information processing systems*, 27, 2014.
- Xiaoyu Tian, Tao Jiang, Longfei Yun, Yucheng Mao, Huitong Yang, Yue Wang, Yilun Wang, and Hang Zhao. Occ3d: A large-scale 3d occupancy prediction benchmark for autonomous driving. *Advances in Neural Information Processing Systems*, 36:64318–64330, 2023.
- Aaron Van Den Oord, Oriol Vinyals, et al. Neural discrete representation learning. *Advances in neural information processing systems*, 30, 2017.
